# Supplementary material for: Oleanolic acid blocks the purine salvage pathway for cancer therapy by inactivating SOD1 and stimulating lysosomal proteolysis
Source: PubMed Central journal article supplement (PMC8505360; doi:10.1016/j.omto.2021.08.013), 2021-08-28
Supplement: mmc1.pdf [file mmc1.pdf]

**Supplemental information**

**Oleanolic acid blocks the purine salvage pathway for cancer therapy by  
inactivating SOD1 and stimulating lysosomal proteolysis**

**Dan Liu, Xing Jin, Guanzhen Yu, Mingsong Wang, Lei Liu, Wenjuan Zhang, Jia Wu, Fengying Wang, Jing Yang, Qin Luo, Lili Cai, Xi Yang, Xisong Ke, Yi Qu, Zhenye Xu, Lijun Jia, and Wen-Lian Chen**

## **Supplemental information**

### **Supplemental Materials and Methods**

#### **Apoptosis assay**

A549 and MDA-MB-231 cells were seeded into 6-well plates at a density of  $1.5 \times 10^5$ /well, and then treated by 200  $\mu$ M OA for 0, 24, or 48 hours. Spent medium of each well was collected individually to harvest cells by centrifuging at 1500 rpm for 5 minutes, while adherent cells of each well were digested with 0.5% trypsin and harvested. For each well, cells from spent medium and adherent cells were combined together and then washed by PBS for 2 times. Finally, cell apoptosis assay was implemented on a flow cytometer (BD FACSVerse™, New Jersey, USA) using an AnnexinV-FITC and PI Apoptosis Kit (Yuheng Biotechnology, Suzhou, China) according to the manufacturer's instructions.

#### **Cell cycle analysis**

A549 and MDA-MB-231 cells were seeded into 6-well plates at a density of  $1.5 \times 10^5$ /well and treated by 200  $\mu$ M OA for 0, 24, or 48 hours. After removal of the spent medium, OA-treated cells and control cells were harvested and fixed with 70% ethanol at -20 °C overnight. Subsequently, the fixed cells were stained with propidium iodide (PI) (Sigma, St. Louis, MO, USA) at a concentration of 36 mg/mL at 37 °C for 15 minutes. Next, these cells were used for fluorescence activated cell sorting (FACS) analysis by a flow cytometer (BD FACSVerse™, New Jersey, USA). Data were analyzed with FlowJo 7.6 software.

### **Co-immunoprecipitation and ubiquitination assays of HGPRT**

For the co-IP assay of HGPRT, A549 cells treated by vehicle or 200  $\mu$ M OA for 8 hours were harvested and lysed in NP40 buffer (Beyotime, Shanghai, China) for 30 minutes on ice, and then centrifuged at 13,000  $\times$ g for 15 minutes at 4  $^{\circ}$ C. The lysates were incubated with anti-rabbit IgG (Cell Signaling Technology, Boston, Massachusetts, USA) or HGPRT antibody (ab109021, Abcam, Cambridge, UK) at 4  $^{\circ}$ C with rocking overnight. Subsequently, the lysates were incubated with protein A/G PLUS-Agarose beads (Santa Cruz, Dallas, Texas, USA) at 4  $^{\circ}$ C for 2 hours. The proteins binding to the beads were washed for three times by using NP40 buffer and then boiled for 10 minutes at 95  $^{\circ}$ C, followed by SDS-PAGE, and finally analyzed by immunoblotting with primary antibodies against human hypoxanthine-guanine phosphoribosyltransferase (ab109021, Abcam, Cambridge, UK) and ubiquitin (Santa Cruz, Dallas, Texas, USA).

Table S1. Clinical characteristics of lung cancer patient cohort 1.

|                    | Lung adenocarcinoma (n=5) |
|--------------------|---------------------------|
| Age, years         |                           |
| Median             | 64                        |
| Range              | 58-68                     |
| Gender, no. (%)    |                           |
| Male               | 2 (40)                    |
| Female             | 3 (60)                    |
| TNM stage, no. (%) |                           |
| 1                  | 2 (40)                    |
| 2                  | 2 (40)                    |
| 3                  | 1 (20)                    |

Table S2. Clinical characteristics of lung cancer patient cohort 2.

|                    | Lung adenocarcinoma (n=17) | Lung squamous cell carcinoma (n=17) |
|--------------------|----------------------------|-------------------------------------|
| Age, years         |                            |                                     |
| Median             | 60                         | 60                                  |
| Range              | 41-75                      | 43-78                               |
| Gender, no. (%)    |                            |                                     |
| Male               | 11 (64.7)                  | 14 (82.3)                           |
| Female             | 6 (35.3)                   | 3 (17.6)                            |
| TNM stage, no. (%) |                            |                                     |
| 1                  | 5 (29.4)                   |                                     |
| 2                  | 6 (35.3)                   | 7 (41.2)                            |
| 3                  | 4 (23.5)                   | 5 (29.4)                            |
| 4                  | 1 (5.9)                    | 1 (5.9)                             |
| Unclassified       | 1 (5.9)                    | 4 (23.5)                            |

Table S3. Clinical characteristics of breast cancer patient cohort.

|                    | Luminal-like<br>(n=10) | Triple Negative<br>(n=1) | HER2 positive<br>(n=1) | Unclassified<br>(n=8) |
|--------------------|------------------------|--------------------------|------------------------|-----------------------|
| Age, years         |                        |                          |                        |                       |
| Median             | 52                     | 49                       | 59                     | 47                    |
| Range              | 36-72                  | 49                       | 59                     | 37-69                 |
| Gender, no. (%)    |                        |                          |                        |                       |
| Female             | 10 (100)               | 1 (100)                  | 1 (100)                | 8 (100)               |
| TNM stage, no. (%) |                        |                          |                        |                       |
| 1                  | 3 (30)                 | 0 (0)                    | 0 (0)                  | 0 (0)                 |
| 2                  | 5 (50)                 | 1 (100)                  | 1 (100)                | 3 (37.5)              |
| 3                  | 2 (20)                 | 0 (0)                    | 0 (0)                  | 4 (50.0)              |
| 4                  | 0 (0)                  | 0 (0)                    | 0 (0)                  | 0 (0)                 |
| Unclassified       | 0 (0)                  | 0 (0)                    | 0 (0)                  | 1 (12.5)              |

Table S4. Clinical characteristics of lung cancer patient cohort 3.

|                    | Lung adenocarcinoma (n=21) | Lung squamous cell carcinoma (n=13) |
|--------------------|----------------------------|-------------------------------------|
| Age, years         |                            |                                     |
| Median             | 60                         | 63                                  |
| Range              | 42-79                      | 58-77                               |
| Gender, no. (%)    |                            |                                     |
| Male               | 10 (47.6)                  | 11 (84.6)                           |
| Female             | 11 (52.4)                  | 2 (15.4)                            |
| TNM stage, no. (%) |                            |                                     |
| 1                  | 1 (4.8)                    | 0                                   |
| 2                  | 13 (61.9)                  | 10 (76.9)                           |
| 3                  | 6 (28.5)                   | 3 (23.1)                            |
| 4                  | 1 (4.8)                    | 0                                   |

Table S5. Sequences of gene-specific q-PCR primers in this study.

| Gene         | NCBI Lous ID | Forward primer sequence (5'-3') | Reverse primer sequence (5'-3') |
|--------------|--------------|---------------------------------|---------------------------------|
| <i>HPRT1</i> | NM_3251      | CCTGGCGTCGTGATTAGTGAT           | AGACGTTTCAGTCCTGTCCATAA         |
| <i>NT5E</i>  | NM_4907      | AAGGACTGATCGAGCCACTC            | GGAAGTGTATCCAACGATTCCCA         |
| <i>ACTIN</i> | NM_001101.3  | CACTCTTCCAGCCTTCCTTC            | GTACAGGTCTTTGCGGATGT            |

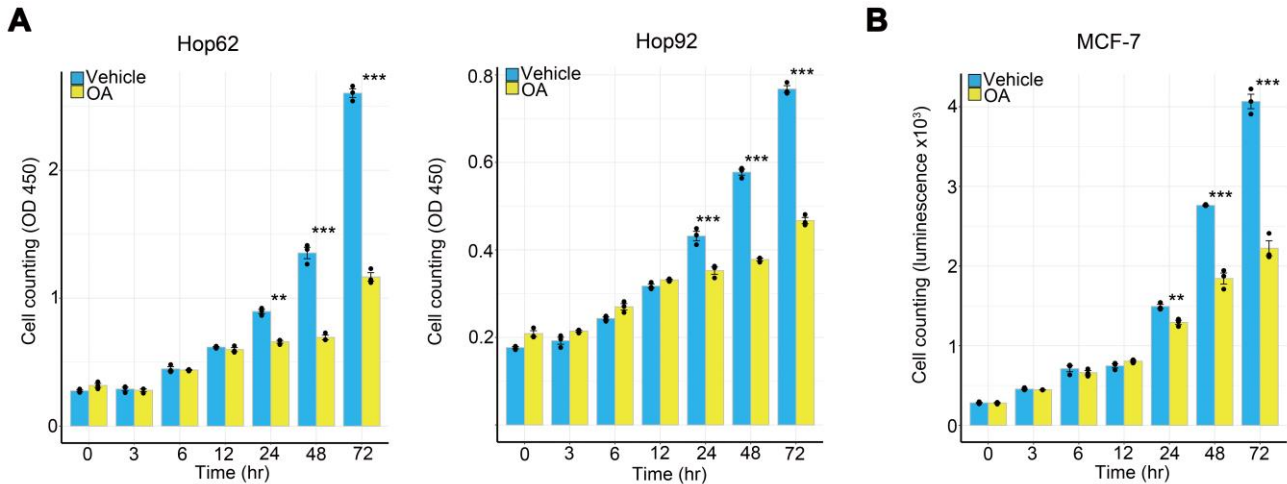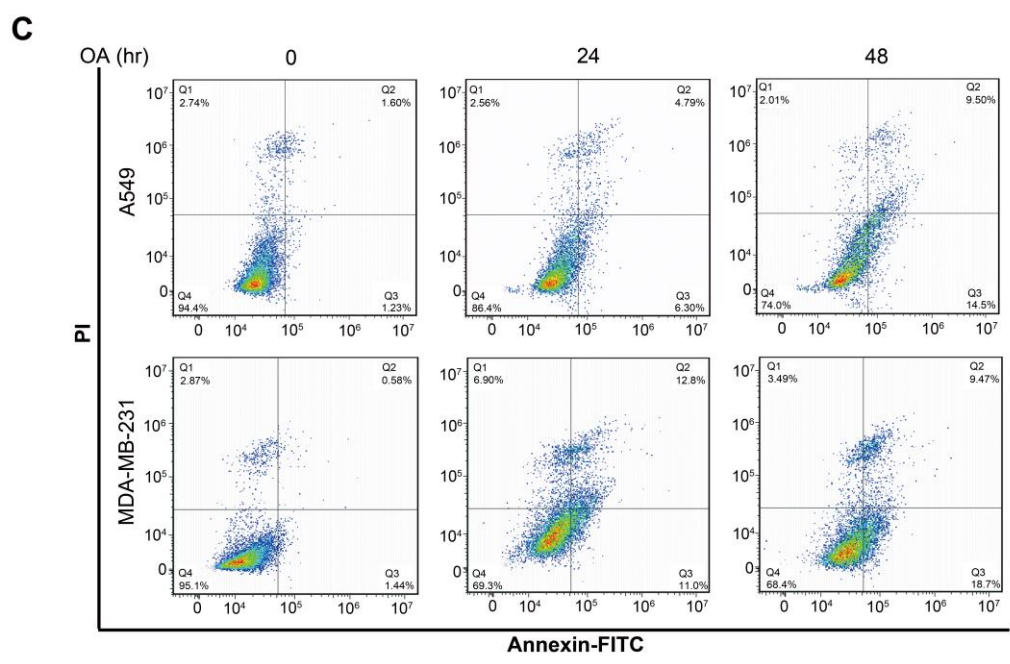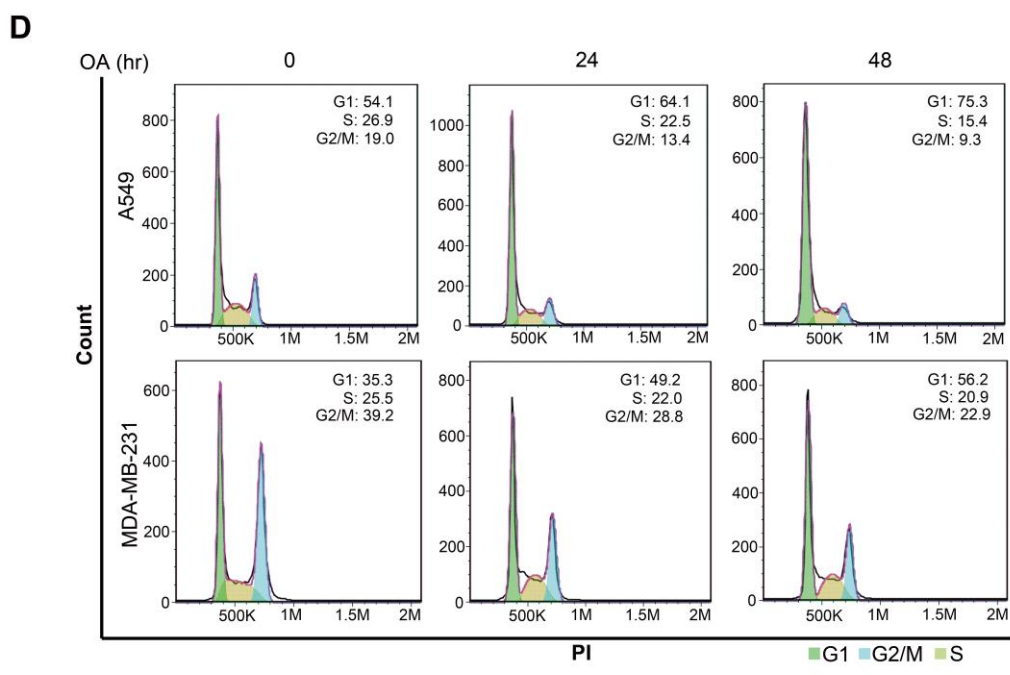

**Figure S1 Oleanolic acid impedes cancer cell growth and induces cell apoptosis and cell cycle arrest *in vitro*.**

**(A-B)** The time-course influence of 200  $\mu$ M oleanolic acid (OA) on the cell proliferation of two lung cancer cell lines Hop92 and Hop62, and one breast cancer cell line MCF-7. **(C)** The time course impact of 200  $\mu$ M OA on cell apoptosis of A549 and MDA-MB-231 cells. **(D)** The time course effect of 200  $\mu$ M OA on cell cycle of A549 and MDA-MB-231 cells.

Error bars represent mean  $\pm$  SEM. \*  $p < 0.05$ , \*\*  $p < 0.01$ , \*\*\*  $p < 0.001$ , Student's t test.



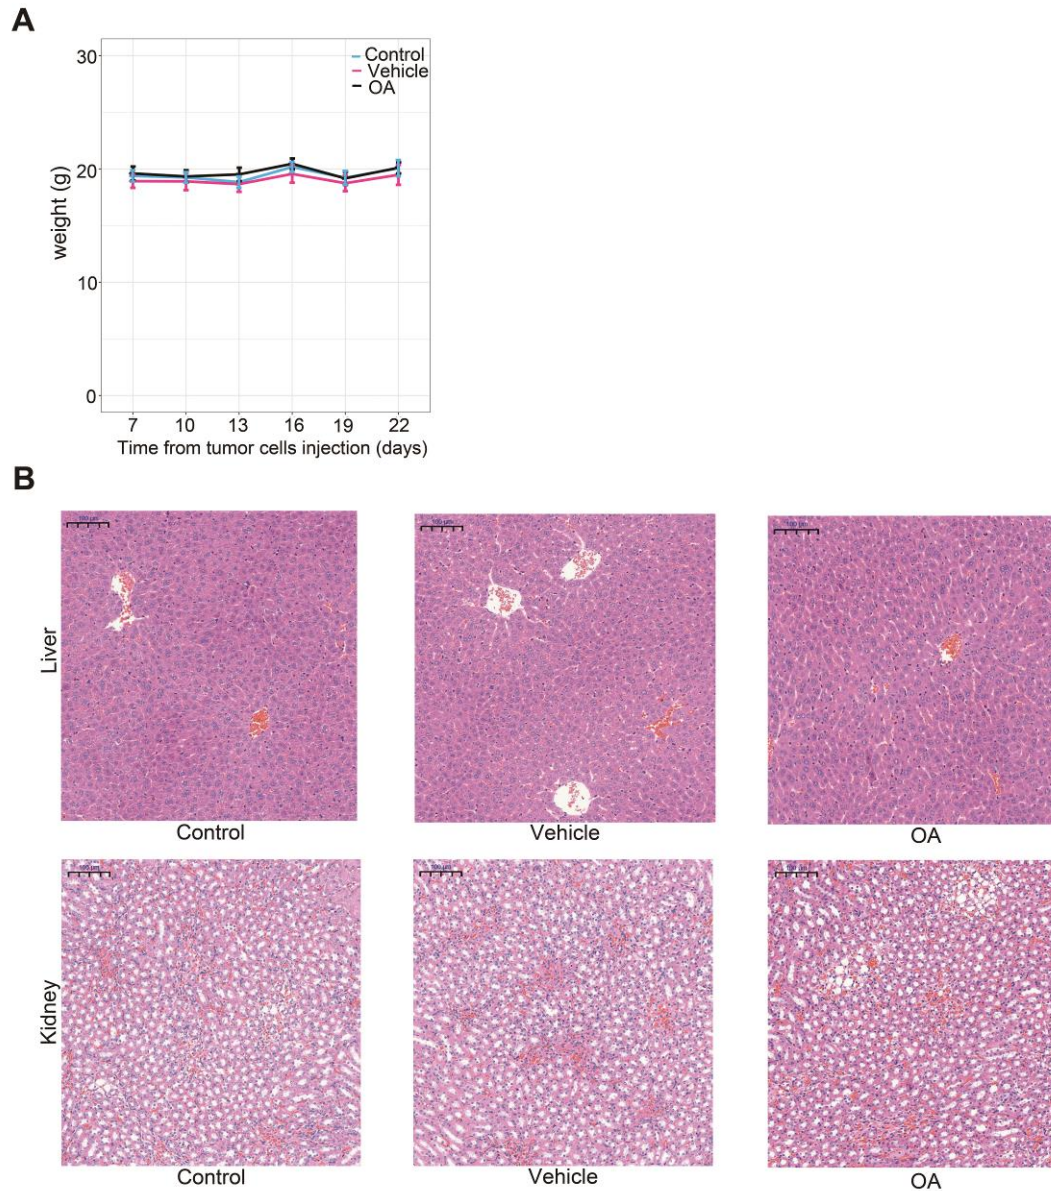

**Figure S2. The influence of oleanolic acid treatment on mouse body weight and histological structure of liver and kidney.**

**(A)** Body weight of healthy control mice, A549 tumor-bearing mice treated with vehicle, and A549 tumor-bearing mice treated with oleanolic acid (OA, 120 mg/kg/day). Error bars represent mean  $\pm$  SEM. **(B)** Histological structure of liver and kidney tissues from healthy control mice, A549 tumor-bearing mice treated with vehicle, and A549 tumor-bearing mice treated with OA (120 mg/kg/day). Scale bars, 100  $\mu$ m.

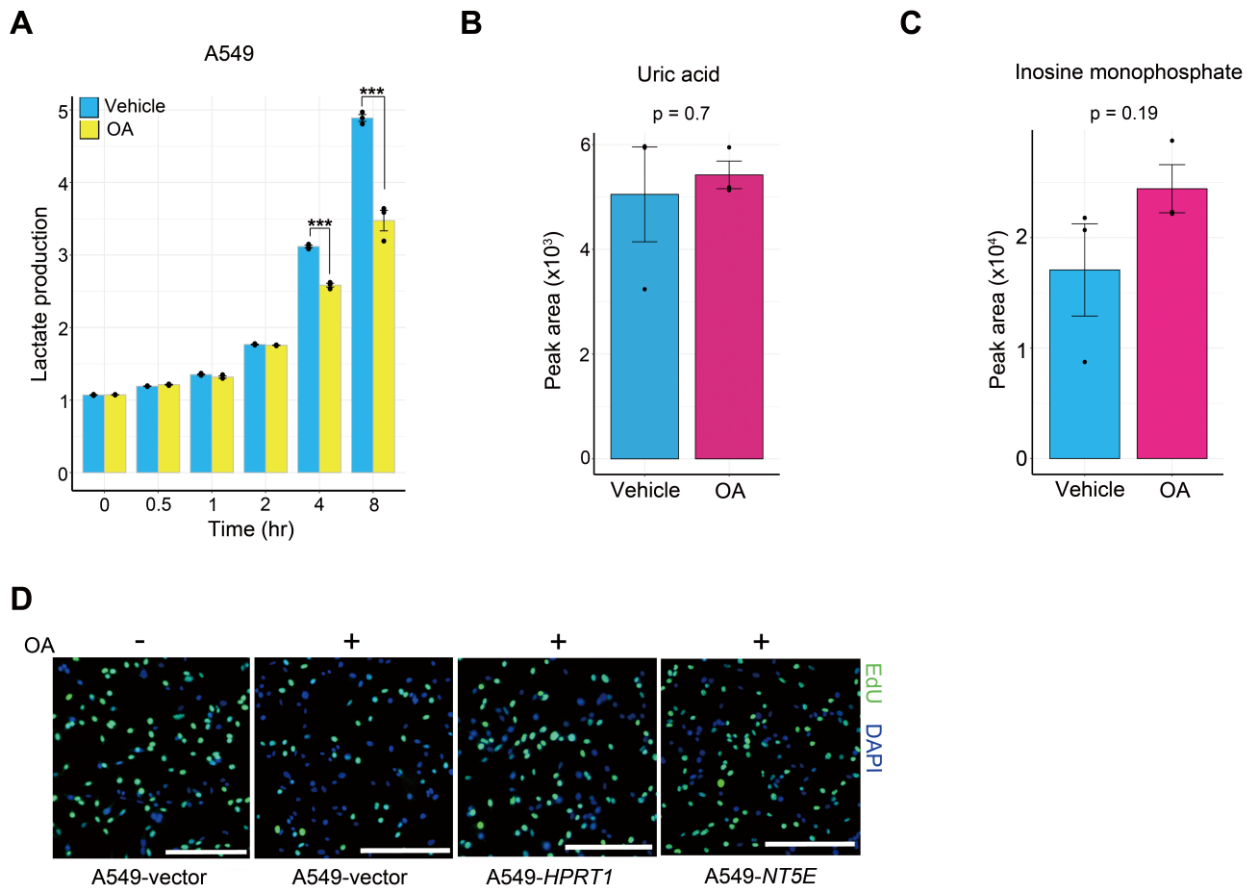

**Figure S3. The impact of oleanolic acid treatment on cancer cell metabolism and the rescue effect of enforced expression of *HPRT1* or *NT5E* on DNA synthesis suppressed by oleanolic acid in A549 cells.**

(A) The time course assay of lactate production of A549 cells treated by 200  $\mu$ M oleanolic acid (OA). (B) Uric acid generation between A549 cells treated by vehicle (1/1000 DMSO) and A549 cells treated by 200  $\mu$ M OA for 8 hours. (C) Inosine monophosphate (IMP) production between A549 cells treated by vehicle (1/1000 DMSO) and A549 cells treated by 200  $\mu$ M OA for 8 hours. (D) DNA synthesis was remarkably refrained in A549-vector cells treated by 200  $\mu$ M OA for 8 hours as compared to A549-vector cells treated by vehicle. Of note, impaired DNA synthesis elicited by OA was overtly rescued by forced expression of *HPRT1* or *NT5E*. DNA synthesis was measured by EdU incorporation (green), while cell nuclei were stained by DAPI (blue). Scale bars, 100  $\mu$ m.

Error bars represent mean  $\pm$  SEM. \* $p < 0.05$ , \*\* $p < 0.01$ , \*\*\* $p < 0.001$ , Student's t test.

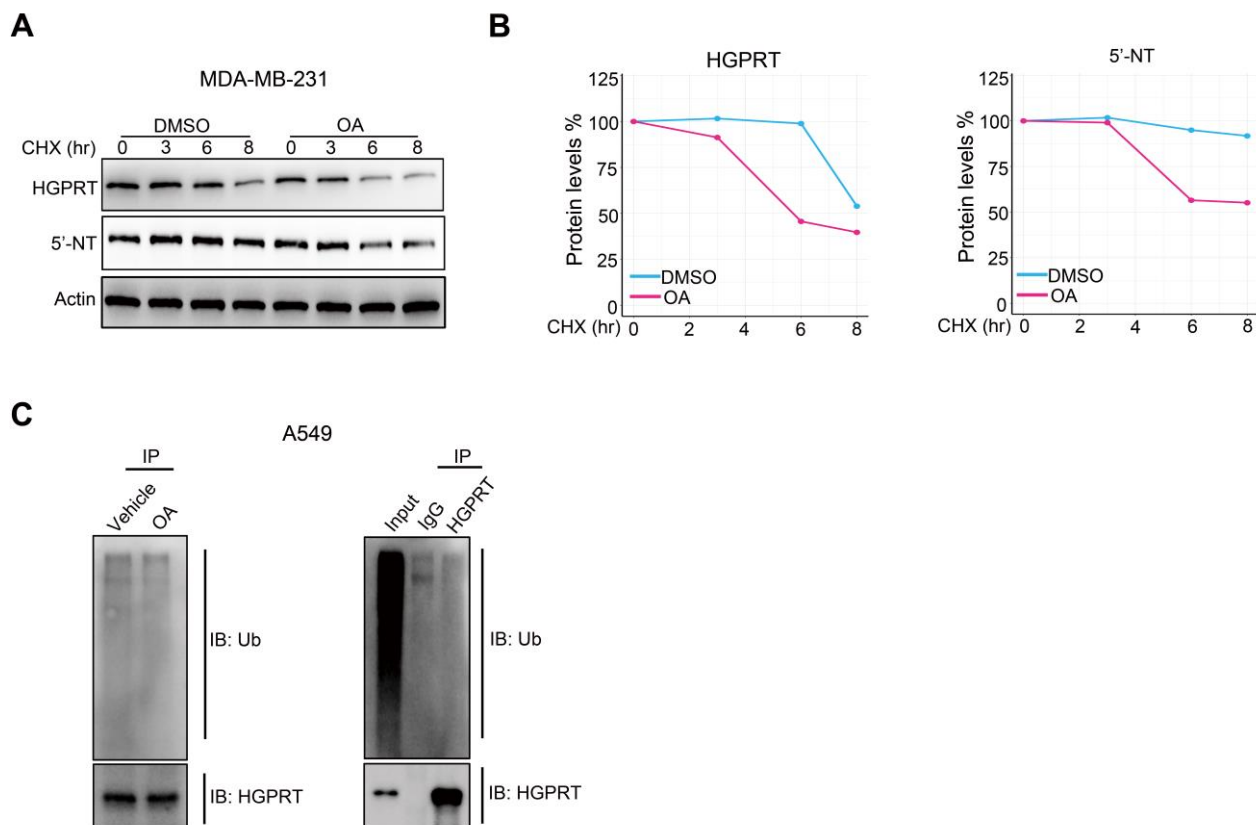

**Figure S4. Oleanolic acid expedites the degradation of PSP enzymes via lysosomal pathway but not ubiquitination pathway.**

(A-B) The time-course influence of 200  $\mu$ M oleanolic acid (OA) treatment on HGRPT and 5'-NT degradation when using cycloheximide (CHX, 50  $\mu$ g/mL) to block protein synthesis in MDA-MB-231 cells. The curves on the right side (B) displaying the quantification results of the protein levels across different time points. (C) The effect of 200  $\mu$ M OA treatment for 8 hours on the ubiquitination status of HGPRT in A549 cells. The affinity and specificity of the anti-HGPRT antibody to cellular HGPRT protein was validated as showed by the immunoblots on the right side.

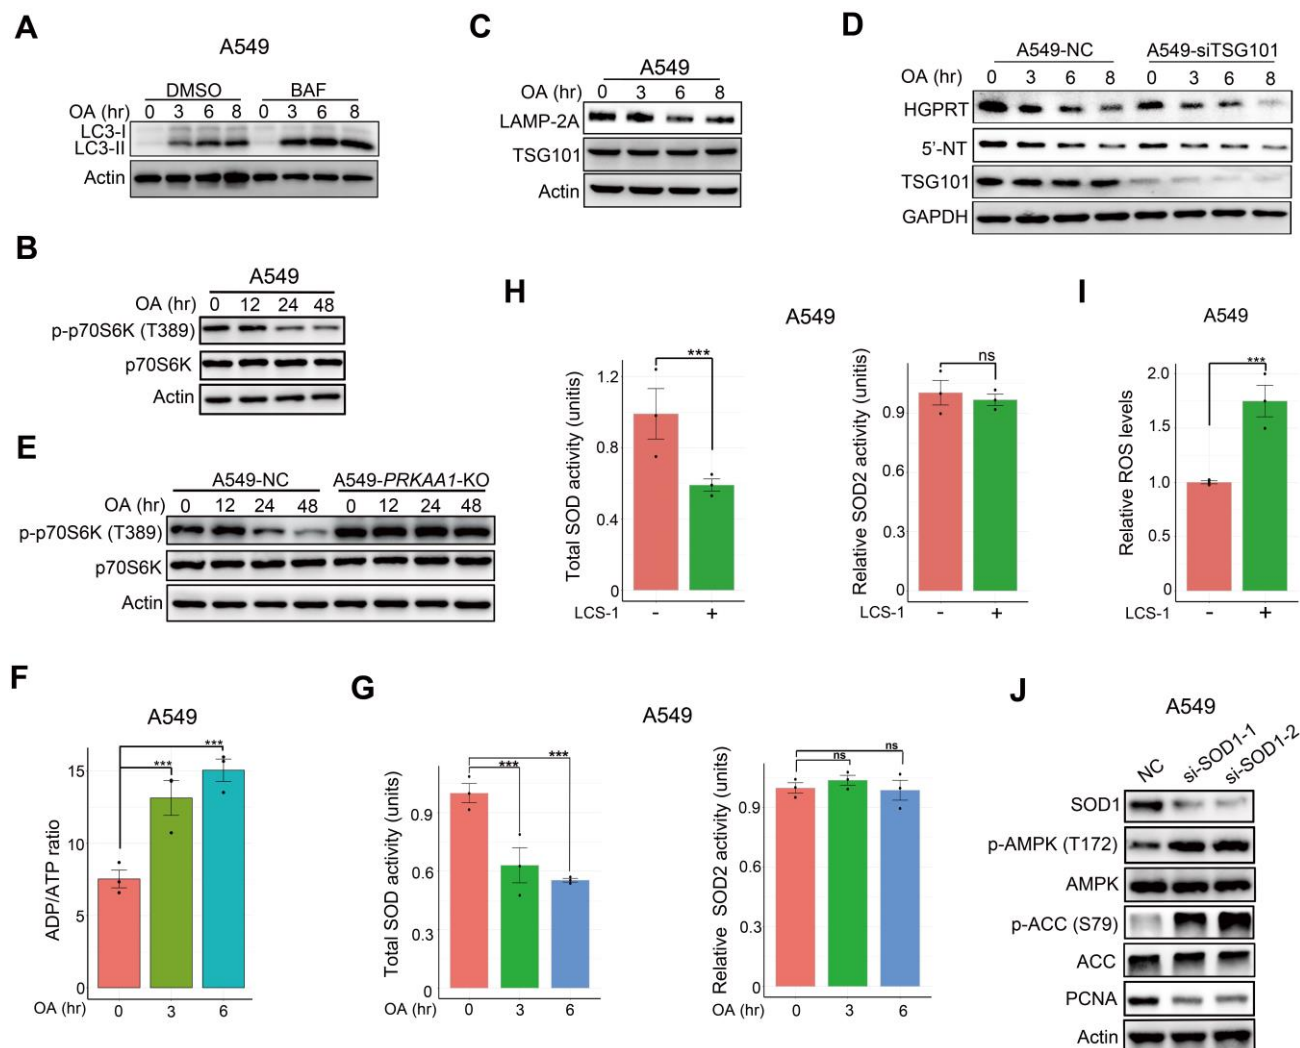

**Figure S5. Stimulation of macroautophagy but not microautophagy and chaperone-mediated autophagy by oleanolic acid treatment, and the underlying mechanism of oleanolic acid-activated macroautophagy.**

(A) Western blot showing the time course of a lysosome inhibitor bafilomycin A1 (BAF, 0.08  $\mu$ M) treatment effect on LC3-I/II levels in A549 cells under the condition of 200  $\mu$ M OA treatment. (B) Western blot showing the time course of the impact of 200  $\mu$ M OA treatment on the expression of phospho-p70S6K (T389) and p70S6K in A549 cells. (C) Western blot showing the time course of the effect of 200  $\mu$ M OA treatment on the expression of TSG101 and LAMP-2A in A549 cells. TSG101 is a microautophagy-related protein, while LAMP-2A is a chaperone-mediated

autophagy-related protein. **(D)** Western blot showing the time course of the effect of 200  $\mu$ M OA treatment on the expression of HGPRT and 5'-NT between control A549 cells and A549 cells with TSG101 silencing. TSG101 knockdown was used to inhibit microautophagy. **(E)** Western blot showing the time course of the effect of 200  $\mu$ M OA treatment on the expression of phospho-p70S6K (T389) and p70S6K in A549 cells with and without *PRKAA1*-KO. **(F)** The time course of the effect of 200  $\mu$ M OA treatment on ADP/ATP ratio in A549 cells. **(G)** The time course of the influence of 200  $\mu$ M OA treatment on the activities of total superoxide dismutases (SODs) and SOD2 in A549 cells. **(H)** The impact of a SOD1 inhibitor LCS-1 (5  $\mu$ M) treatment for 6 hours on the activity of total SODs and SOD2 in A549 cells. **(I)** Measurement of ROS generation in A549 cells with or without LCS-1 (5  $\mu$ M) treatment for 6 hours. **(J)** Western blot showing the impact of SOD1 silencing on the expression of SOD1, phospho-AMPK (T172), AMPK, phospho-ACC (S79), ACC and PCNA in A549 cells. The cells were treated by siRNAs for 72 hours. NC, nontarget control siRNA sequence. Error bars represent mean  $\pm$  SEM. \* $p < 0.05$ , \*\* $p < 0.01$ , \*\*\* $p < 0.001$ , Student's t test. Ns, no significance.
